# Supplementary material
Source: Springer Nature journal article supplement (https://www.springermedizin.de/resource/supplementary/12986_2013_571_MOESM2_ESM.pdf/25655056)

Serum 25(OH)D % Change  
From Bsl to 168-h

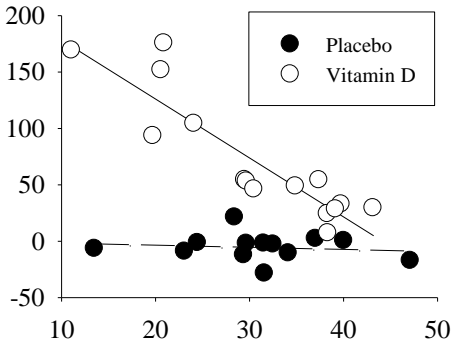

Bsl Serum 25(OH)D (ng/mL)

Supplement: MOESM2 [file 25655056]
